# Supplementary material
Source: PubMed Central journal article supplement (PMC4937513)
Supplement: 10.1074_M116.058412_mcp.M116.058412-1.pdf [file 10.1074_M116.058412_mcp.M116.058412-1.pdf]

**Supplemental Table 1. Comparison of H2B variants**

| PrimerName      | Sequence (5'-3')        | Ref        | PrimerBankID |
|-----------------|-------------------------|------------|--------------|
| HIST1H2BB 151 F | CCCGACACCGGCATCTCATCCA  | (34)       |              |
| HIST1H2BB 352 R | CCTTAGTGCCCTCGGACACAGCA | (34)       |              |
| HIST1H2BC 47 F  | AGAAGGCAGTGACCAAAGCGCAG | (34)       |              |
| HIST1H2BC 183 R | GCCCATGGCCTTGAAGAGATGC  | (34)       |              |
| HIST1H2BD 47 F  | ACGATGCCTGAACCTACCAA    | (34)       |              |
| HIST1H2BD 115 R | AGCCTTAGTCACCGCCTTCT    | (34)       |              |
| HIST1H2BH 87 F  | GCGTAAACGCAGCCGCAAGG    | (34)       |              |
| HIST1H2BH 323 R | GCCAGTTCCCCAGGCAGCAG    | (34)       |              |
| HIST1H2BJ 55 F  | GCCAGCGAAGTCTGCTCCCG    | (34)       |              |
| HIST1H2BJ 156 R | CTCTCCTTGGCGCTGCGCTT    | (34)       |              |
| HIST1H2BK 8F    | TGCTGCTCGTCTCAGGCTCGT   | (34)       |              |
| HIST1H2BK 152 R | CTCTCCTTGGCGCTGCGCTT    | (34)       |              |
| HIST1H2BN 61F   | CAAAGTCCGCTCCTGCCCCG    | (34)       |              |
| HIST1H2BN 162R  | TGACCGAACGTTCCGCGGTG    | (34)       |              |
| HIST1H2BO 23 F  | TTCACTCTCCTCCGCCATGCC   | (34)       |              |
| HIST1H2BO 146 R | CTCTTTGCGGCTGCGCTTGC    | (34)       |              |
| HIST2H2BE 767 F | CCTGGTGGCTCCTTGGGTCTGT  | (34)       |              |
| HIST2H2BE 958 R | TATCCACAGGAGGCCCCATCGC  | (34)       |              |
| HIST2H2BF 241 F | CCTCCACCCACCACCCTC      | (34)       |              |
| HIST2H2BF 397 R | ATGGACTCGGGAACCGCCGA    | (34)       |              |
| Bcatexp150F     | CATCTACACAGTTTGATGCTGCT | PrimerBank | 148233337c2  |
| Bcatexp150R     | GCAGTTTTGTCAGTTCAGGGA   | PrimerBank |              |
| Claud1exp107F   | TCTGGCTATTTTAGTTGCCACAG | PrimerBank | 296785063c2  |
| Claud1exp107R   | AGAGAGCCTGACCAAATTCGT   | PrimerBank |              |
| Claud3exp182F   | AACACCATTATCCGGGACTTCT  | PrimerBank | 171541813c1  |
| Claud3exp182R   | GCGGAGTAGACGACCTTGG     | PrimerBank |              |
| Ecadexp109F     | ATTTTCCCTCGACACCCGAT    | PrimerBank | 169790842c2  |
| Ecadexp109R     | TCCAGGCGTAGACCAAGA      | PrimerBank |              |
| Ncadexp136F     | AGCCAACCTTAAGTGGAGGAGT  | PrimerBank | 215422305c2  |
| Ncadexp136R     | GGCAAGTTGATTGGAGGGATG   | PrimerBank |              |
| Slugexp87F      | CGAACTGGACACACATACAGTG  | PrimerBank | 324072669c1  |
| Slugexp87R      | CTGAGGATCTCTGGTTGTGGT   | PrimerBank |              |
| Snailexp242F    | ACTGCAACAAGGAATACCTCAG  | PrimerBank | 301336132c2  |
| Snailexp242R    | GCACTGGTACTTCTTGACATCTG | PrimerBank |              |
| Vimexp238F      | GACGCCATCAACACCGAGTT    | PrimerBank | 240849334c1  |
| Vimexp238R      | CTTTGTGCTTGGTTAGCTGGT   | PrimerBank |              |
| ZEB1exp106F     | CAGCTTGATACCTGTGAATGGG  | PrimerBank | 291575187c3  |
| ZEB1exp106R     | TATCTGTGGTCGTGTGGGACT   | PrimerBank |              |
| ZO1exp128F      | ACCAGTAAGTCGTCCTGATCC   | PrimerBank | 116875766c2  |
| ZO1exp128R      | TCGGCCAAATCTTCTCACTCC   | PrimerBank |              |
| GAPDHexp197F    | GGAGCGAGATCCCTCCAAAAT   | PrimerBank | 378404907c1  |
| GAPDHexp197R    | GGCTGTTGTCATACTTCTCATGG | PrimerBank |              |

**Supplemental Table 1:** Primers used for qRT-PCR. List of primers (and sequences) used in the study. References for previous study used with primers and the accession of these primers from PrimerBank are listed as well.
