# Supplementary material
Source: PubMed Central journal article supplement (PMC4937513)
Supplement: 10.1074_M116.058412_mcp.M116.058412-4.pdf [file 10.1074_M116.058412_mcp.M116.058412-4.pdf]

Supplementary Figure 3

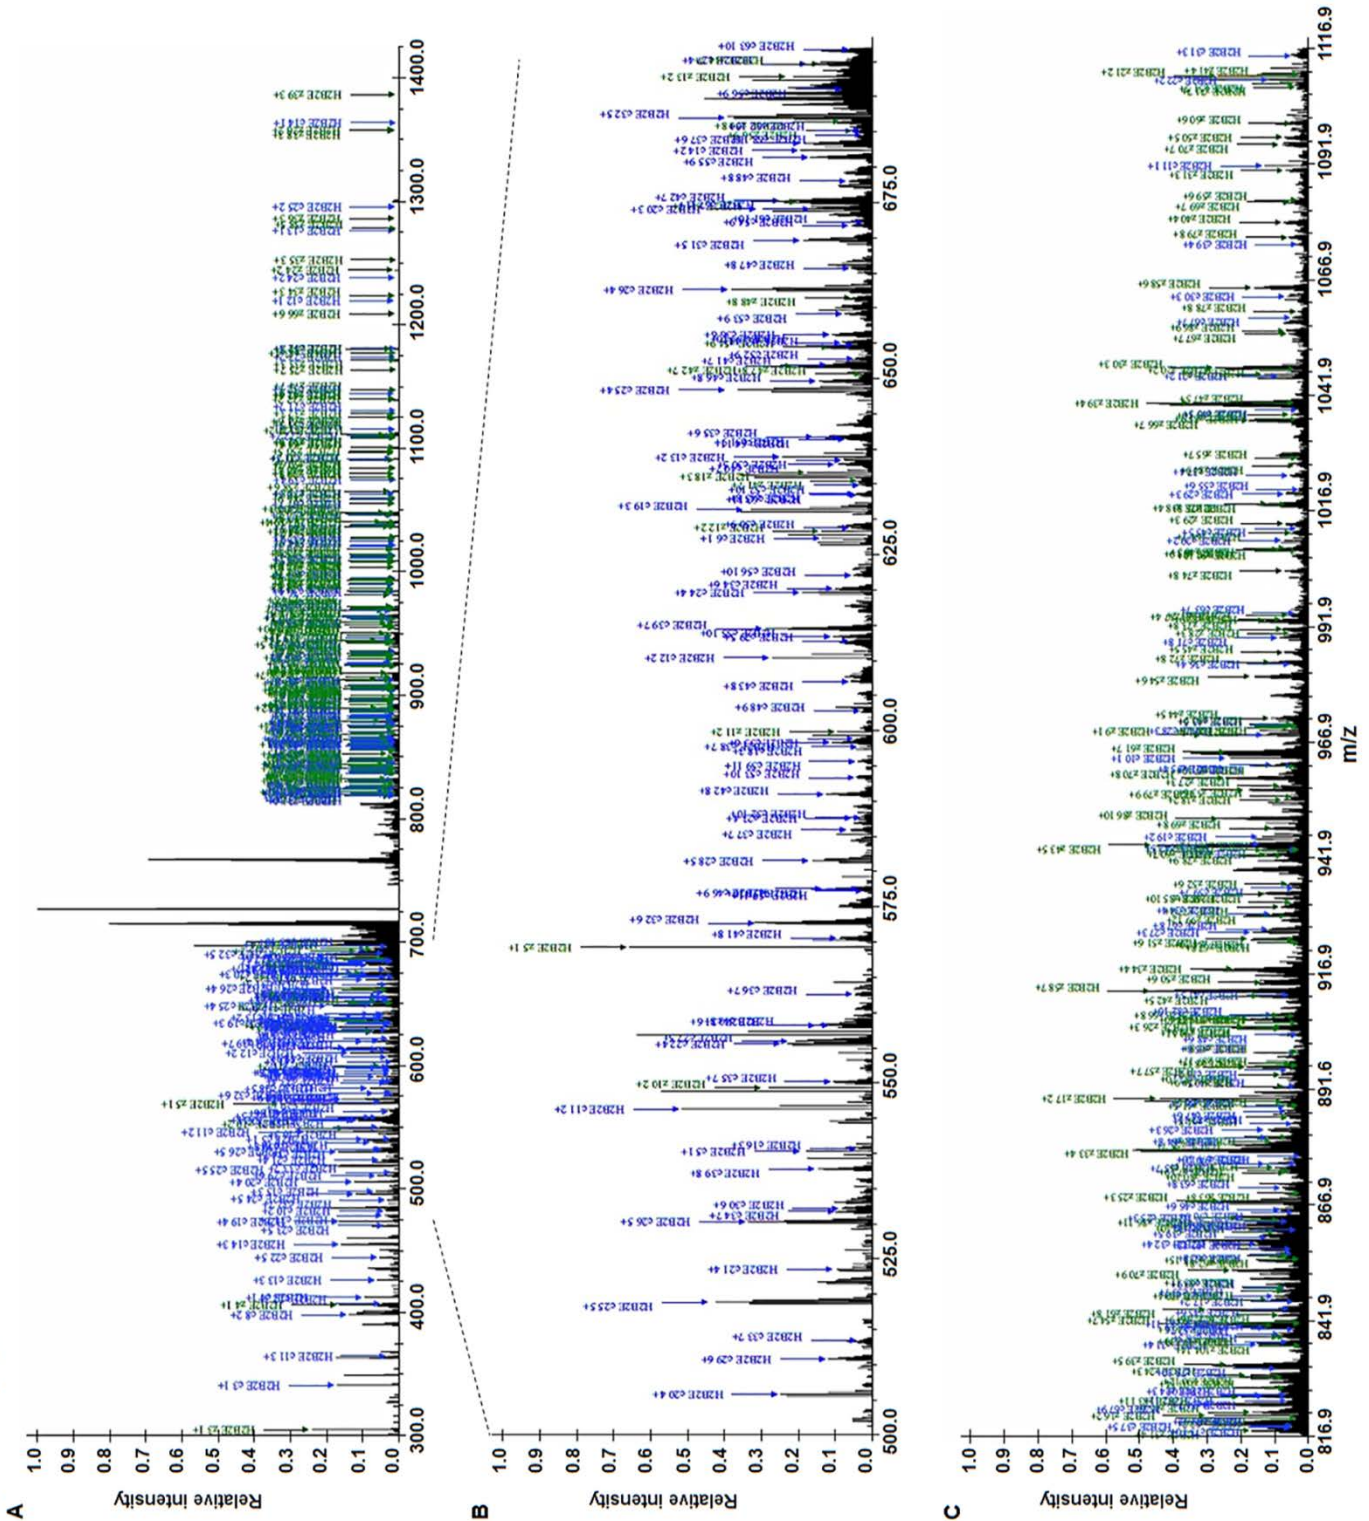

**Supplemental Figure 3. The full spectrum of H2B2E.** Annotated are the most abundant c (blue) and z (green) ions. B: The expanded spectrum of region 300 – 700 m/z of Suppl. Fig. 3A. C. The expanded spectrum of region 800 – 1118 m/z of Suppl. Fig. 3A.
