# Supplementary material
Source: PubMed Central journal article supplement (PMC4937513)
Supplement: 10.1074_M116.058412_mcp.M116.058412-7.pdf [file 10.1074_M116.058412_mcp.M116.058412-7.pdf]

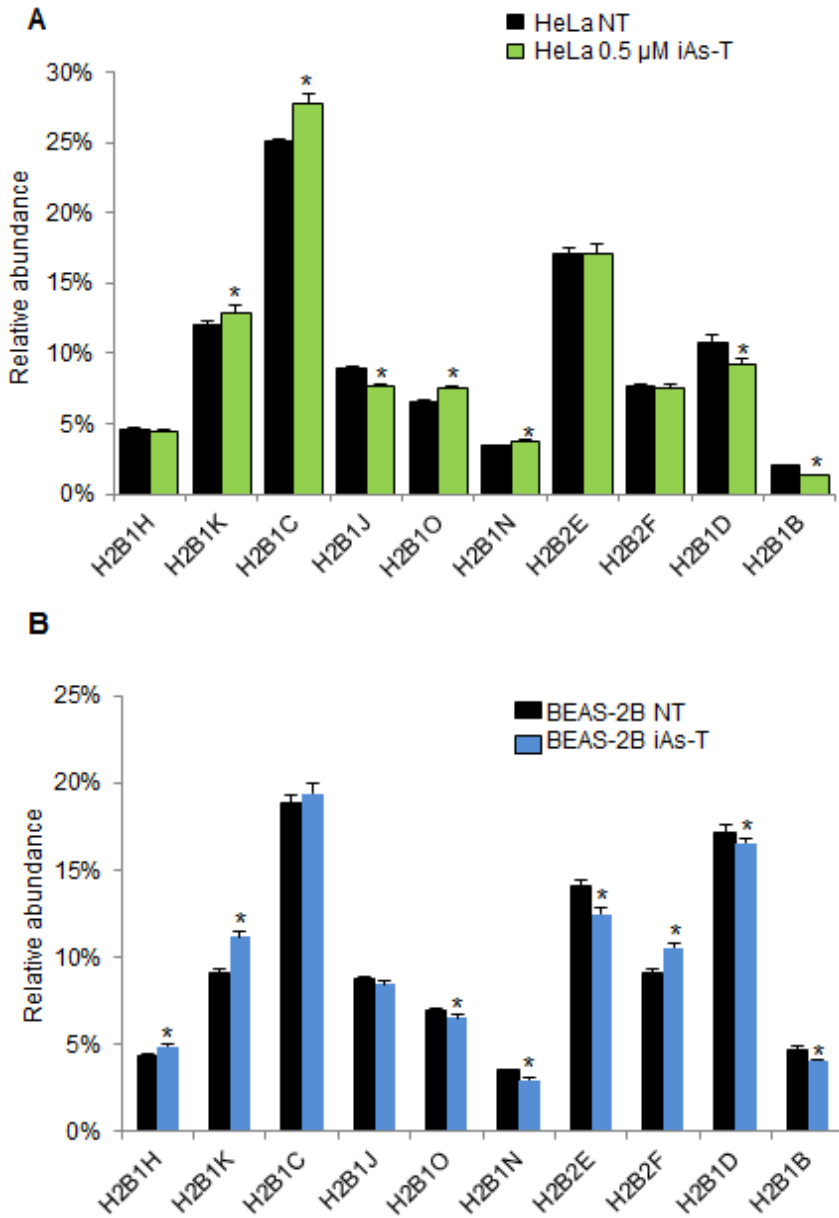

**Supplemental Figure 6**

**Supplemental Fig. 6. Biological Replicates of HeLa and BEAS-2B Mass Spectrometry analysis.** Biological replicate two for each of **A**) HeLa (only 0.5 $\mu$ M was profiled) and **B**) BEAS-2B show similar trends in the differential abundance of the 10 histone H2B variants in iAs-transformed cells as the first replicates shown in Fig 4. Error bars represent S.D from three biological replicates, each containing three technical replicates.
