# Supplementary material
Source: PubMed Central journal article supplement (PMC4937513)
Supplement: 10.1074_M116.058412_mcp.M116.058412-8.pdf [file 10.1074_M116.058412_mcp.M116.058412-8.pdf]

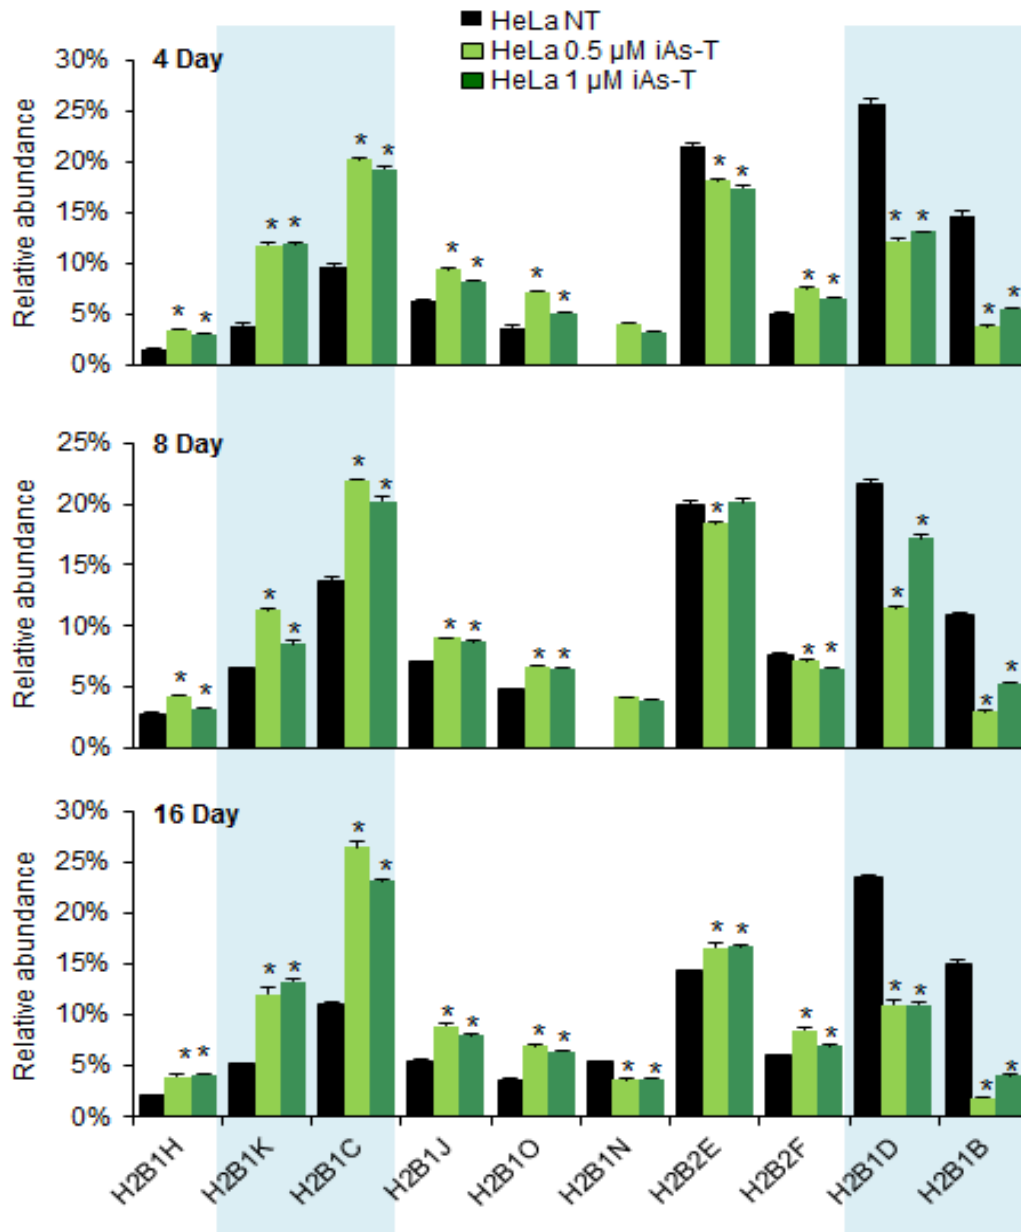

**Supplemental Figure 7**

**Supplemental Fig. 7. Time-dependent changes in H2B variants as cells undergo iAs-mediated EMT.** Measured relative abundances of the various H2B variants at Day 4, 8 and 16 of iAs treatment. The histone variants that were highly changed at all three time points are shaded with a blue box. Error bars represent S.D. from three biological replicates, each containing three technical replicates. Asterisks denote p-values < 0.05 as determined by Student T-test.
