# Supplementary material
Source: PubMed Central journal article supplement (PMC4937513)

Supplementary Figure 4

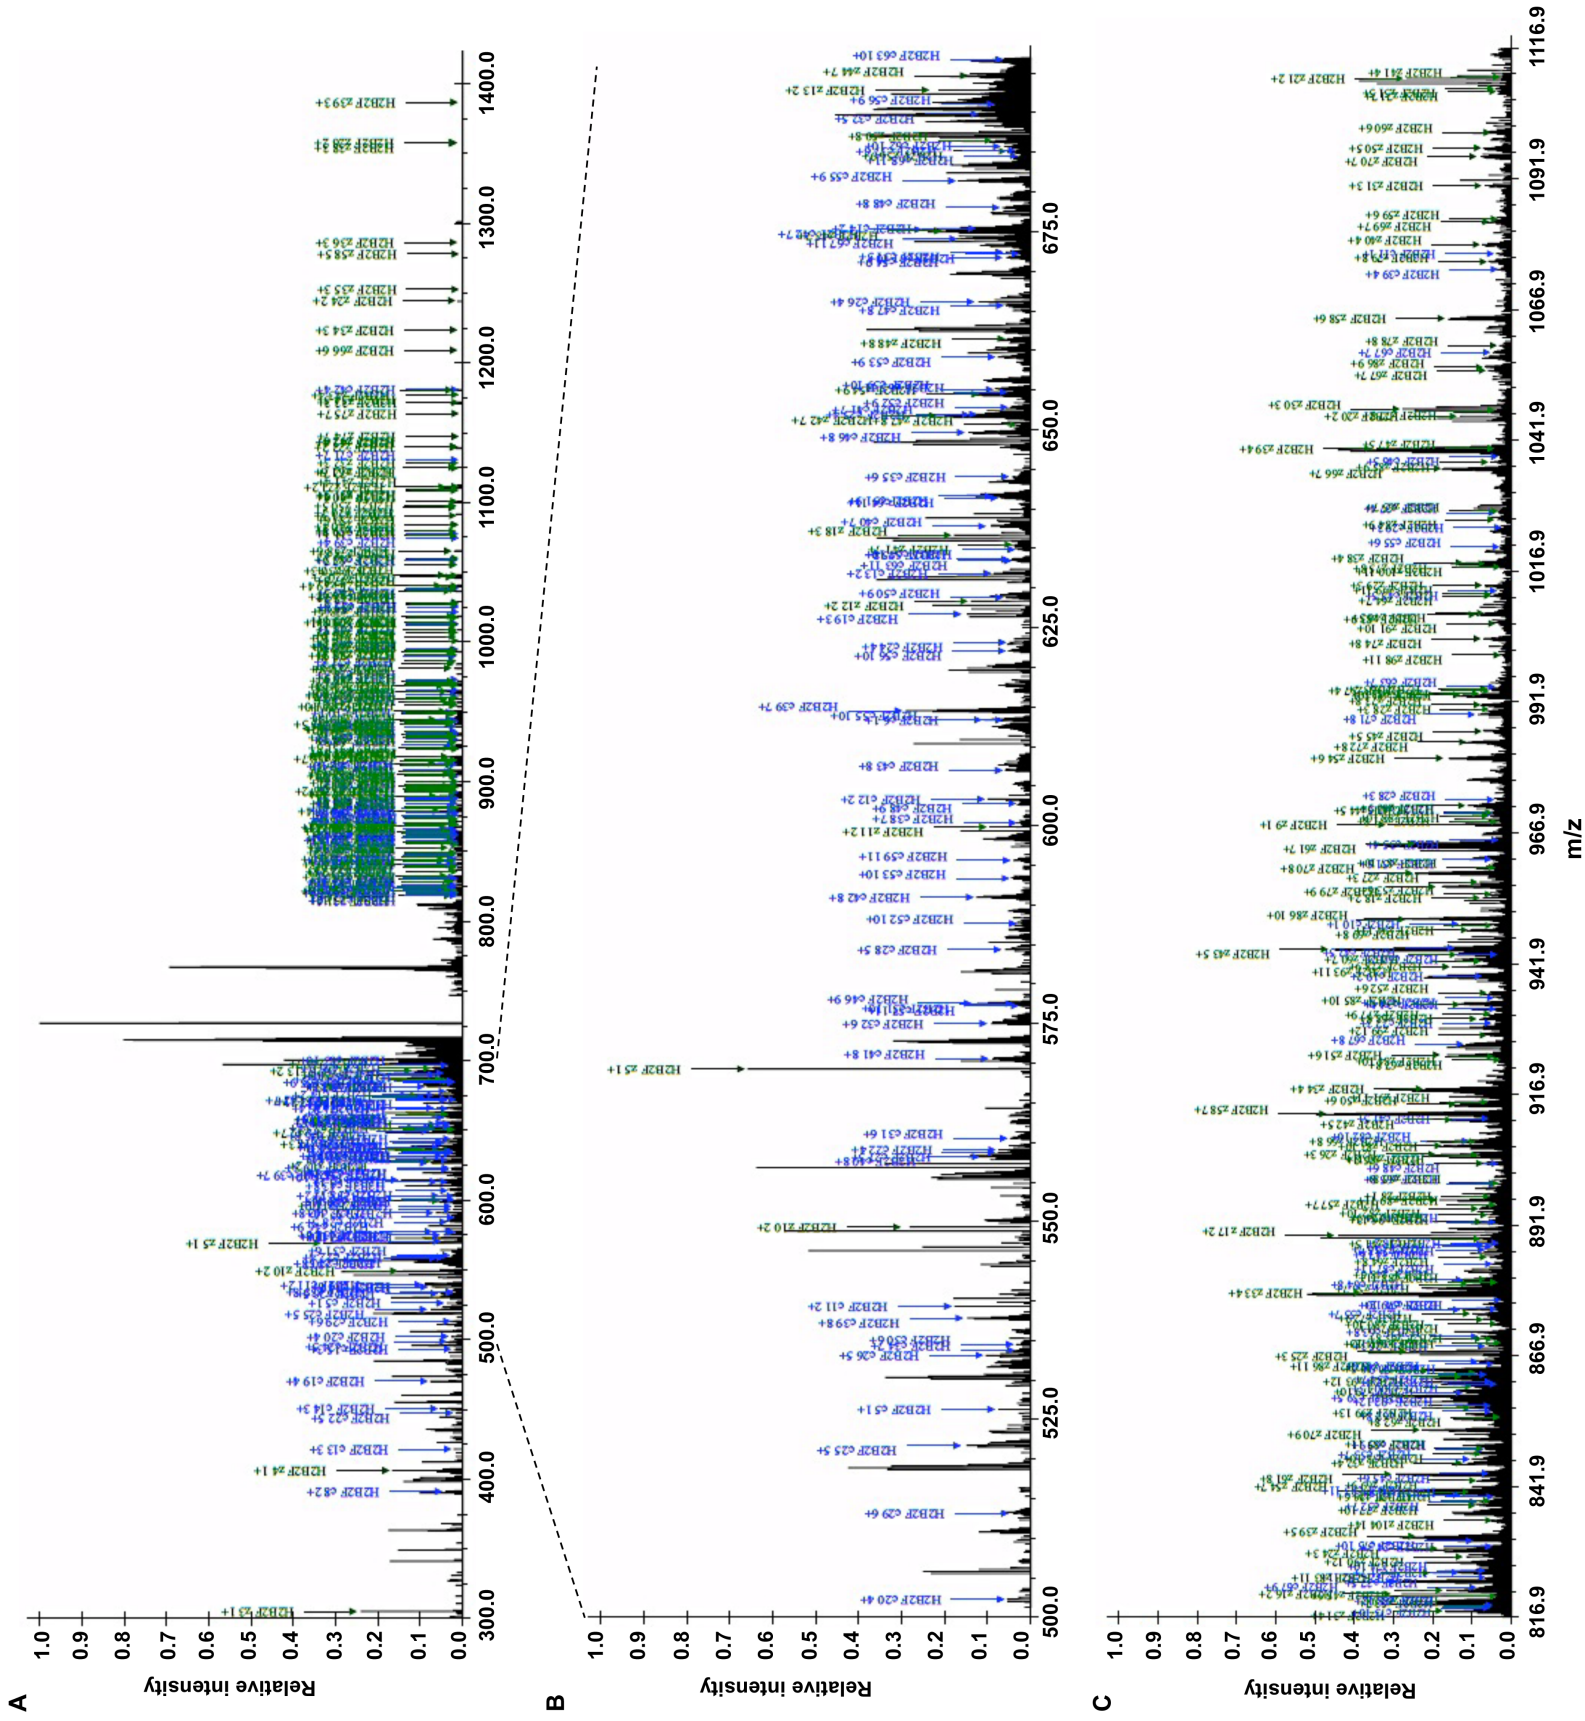

Supplement: 10.1074_M116.058412_mcp.M116.058412-5.pdf [file 10.1074_M116.058412_mcp.M116.058412-5.pdf]
